# Supplementary material for: Novel Genes Associated with Dairy Traits in Sarda Sheep
Source: MDPI journal article supplement (doi:10.3390/ani11082207), 2021-07-26
Supplement: s1 [file s1]

**Table S1.** Gene names, SNP ID and context sequences of the 45 SNPs genotyped in the sampled population of Sarda sheep (n = 1,112)

| Gene symbol                                                                               | SNP ID      | Chr position | Context sequence                                          |
|-------------------------------------------------------------------------------------------|-------------|--------------|-----------------------------------------------------------|
| Protein Kinase AMP-Activated Catalytic Subunit Alpha2 - <i>PRKAA2</i>                     | rs119102735 | 1:30924815   | GGCTCTTTCAGCAGATTCTGTCTGC[C/T]GTGGATTACTGTCATAGGCATATGG   |
|                                                                                           | rs159701443 | 1:30927608   | TCCAGATATCCACTTCAGGACCTGC[A/G]TACAGCCTAGGGGAAGATGACAGCA   |
|                                                                                           | rs159701441 | 1:30927701   | CACCCCCTCGGATCTTCTTAAACAG[C/T]GTAGGCACATGCTCATCATCAAATG   |
|                                                                                           | rs159701440 | 1:30927764   | CCTGCAGCATATGCATCAGGAGAGT[A/G]GCAACAGAACGATTGAGATATTCTG   |
| Protein Kinase AMP-Activated Non-Catalytic Subunit Gamma3 - <i>PRKAG3</i>                 | rs159573140 | 2:219779811  | GATGCCCAGATCTTGGATGGTGCGG[G/T]AGAGGAAGGAGGGCCGGGGCAGCAG   |
|                                                                                           | rs159573109 | 2:219781592  | TCCCTCCAGACACAGCGTCCTCCGC[C/T]TCAGTGCTTCTCCCACACTTATATC   |
|                                                                                           | rs159573167 | 2:219782111  | AGCCTGAGCACCGGCACCTGCGGGG[A/G]CGGGCACTGGGCCGGCCTCTCTTCC   |
| Beta-1,4-Galactosyltransferase 1 - <i>B4GALT1</i>                                         | rs160176029 | 2:37813170   | GTTCTGCAAAGGCGGCGGCGGTGCG[A/G]CCCCTCGCAGCCGGAGCTCCCCGGA   |
|                                                                                           | rs160176020 | 2:37813323   | GAGCAGCGGGGACTCCTCAGGGCAT[A/C]CGGTCAGCGAGCGTGTTGTGGTGGA   |
|                                                                                           | rs160175821 | 2:37862428   | ATTAGTTTCATTTTTCTTGTCTCTC[A/G]AGTGGCGGATCATCCGACACTTCCC   |
|                                                                                           | rs160175809 | 2:37863227   | CAAGTTGGGGGCAATATATCCCCT[C/T]GTCCTGGTCGTCCGGAAAGGCGTCT    |
| Toll Like Receptor 4 - <i>TLR4</i>                                                        | rs160202330 | 2:5881259    | CAGGTGGAGCTCTATCGCCTTCTGA[A/G]CAGGAACACCTACCTGGAGTGGGAG   |
|                                                                                           | rs160202321 | 2:5881892    | ACTTGCTAAATCTTACTCAGAATG[A/C]ATTTGCTTGTGTTTGTGAACATCAG    |
|                                                                                           | rs160202315 | 2:5882073    | AGCCCAGACAGCATTTCCTCCCTC[C/T]CTAGCCTTCAGGTGCTGAATATGAG    |
| Tyrosinase Related Protein 1 - <i>TYRP1</i><br>Insulin Like Growth Factor 1 - <i>IGF1</i> | rs416417209 | 2:80645322   | CCTGGGCTCAGTTCCTCCGAGAGAGTG[C/T]GCTACCATTGAGGCTTTGAGGAATG |
|                                                                                           | rs159876390 | 3:171055347  | GGGGCGCCCTCCGACTGCTCGAGCC[A/G]TACCCCGTGGGCTTGTCTGTTCAGA   |
|                                                                                           | rs159876394 | 3:171108350  | CTCGGGTCCCCCGCGTGGCAGAGCTG[C/G]TGAAGGCGAGCAAGCACAGGGCCAG  |
|                                                                                           | rs401028781 | 3:171113596  | GCAACCAGGACGAGGGGTCATCCCA[G/C]CGCCGTCTTCCAGTCTAGTTTACCC   |
| Growth Hormone Releasing Hormone Receptor - <i>GHRHR</i>                                  | rs409504706 | 4:65329776   | AATCTGGGAGGACTTTCTGGAAGAG[G/T]TGTCCTTGAATTAGACTTTGAAAGA   |
|                                                                                           | rs161797246 | 4:65363733   | CATGGGGCAGCCCTGAGACCCCTTA[C/T]CCAGTGGTCCTGGAAATTGTGCGTA   |
| Cluster of Differentiation 14 Molecule - <i>CD14</i>                                      | rs160087365 | 5:49076357   | ACCACGCCGGAGATCATCGGGTCAT[C/T]TTGGTGCTGGAGGGCTCCAGGGTCC   |
|                                                                                           | rs160087371 | 5:49076541   | GCCCAGCGAACGACAAATTGAGAGA[C/G]CTTAGTGCACTGGGCCAGACACATC   |
|                                                                                           | rs160087378 | 5:49076911   | TCGCCGAGCCAGGCACCTCCTGTTG[C/T]CCACGATACGTTACGGAGACTGAGG   |
|                                                                                           | rs160087383 | 5:49077142   | ATTGTGTCAGCATACTGCTTCGGGT[C/T]GTGTGCGCTCCCTTGAGAACTGTT    |
| ATP Binding Cassette Subfamily G Member 2 - <i>ABCG2</i>                                  | rs159956845 | 6:36443358   | TTCCCTCCACAGGAAGGCGGAAATG[C/T]TCAAAATGTCTTCCAATAGTTACGA   |
|                                                                                           | rs159956885 | 6:36467030   | TGTCATCAGCTCAAATGGATTTC[A/G]GCGTTCATTCAAAAATTTACTGGGT     |
|                                                                                           | rs159956974 | 6:36472926   | TTTCTATGATCTAAAAAATGATCCT[G/T]CAGGAATCCAGAACAGGTGAGTAAA   |

|                                            |             |             |                                                          |
|--------------------------------------------|-------------|-------------|----------------------------------------------------------|
| Neuropeptide FF Receptor 2 - <i>NPFFR2</i> | rs159980590 | 6:86895625  | AACTGGCATTACATTTGGAATAATG[A/C]CACAACACATGATCTGTACTCAGAT  |
|                                            | rs159980593 | 6:86895777  | CACAGTGGTTTGTCTTCATTGTAATG[A/T]GGAACAAACATATGCACACAGTCAC |
| Casein Kinase 1 Gamma 1 - <i>CSNK1G1</i>   | rs160322386 | 7:42831179  | AATACATTGACCCTGAAACCAAAAA[A/G]CATATACCTTATAGGGAACACAAAA  |
| Growth Hormone Receptor – <i>GHR</i>       | rs408890407 | 16:31833017 | CTTTGTCAGGCAAGGGCAGGGCAGT[C/T]GCATTGAGTACGAGGCCCTGTGGAG  |
|                                            | rs161146164 | 16:31833100 | ACAGGTATCTCAGAACTTGGAACAT[T/G]TTCTGCTGTCCCTGACCTCCCGGCT  |
|                                            | rs55631463  | 16:31833271 | AAGTAAGCGCTGTCCACGATGAAGT[C/T]TGCTTGGCTGGGTGTGACCACTTCT  |
|                                            | rs413776054 | 16:31833547 | CTAGCAGGGGCAGCATCATTAGAAG[G/A]TGAGTTATTTTGATTCTTCTGATCA  |
|                                            | rs404237321 | 16:31859509 | AGAGAAACACTTATGATCCACAATA[C/T]CACCATTGCTAGTTAGCTTGATGCA  |
|                                            | rs428862267 | 16:32001143 | CACTGATACTTTTCCAGGGCTATAG[G/A]AATTACTATCTAACTATCATAGTTG  |
|                                            | rs425834583 | 16:32003365 | GGACAGGCACTATAGTATTTCCAGT[A/C]CCGAGGGCCTGTCAAGGACGGTGAT  |
| Toll Like Receptor 2 - <i>TLR2</i>         | rs162073318 | 17:3842561  | ATCCACGGGCCACTCCAGGTAGGTC[C/T]TTGTCAATGGGCTCCAGCAGAATCA  |
| Serpin Peptidase Inhibitor – <i>PI</i>     | rs397514170 | 18:57828567 | CTGCAGCAGCTGGAAGACAAGCTCA[A/G]CAACGAACCTCCTCGCCAAGTTCCTG |
|                                            | rs397514169 | 18:57828697 | GAAGGTGCCCATGATGAACCGCCTG[A/G]GCATGTTTGACCTCCACTACTGTGA  |
|                                            | rs397514168 | 18:57828741 | CACACCACGGAGAGGGACTTCCACG[C/T]GAATGAGCAAACCACCGTGAAGGTG  |
|                                            | rs397514150 | 18:57829882 | CTGCAACTGACCACCGCAATGGTC[C/T]GTTCAATCAATGAGAGTGCAAAGCTA  |
| Phospholipase C Epsilon - <i>1PLCE1</i>    | rs161473124 | 22:14967835 | CAGTGACGAGAACAGTAATGAAAAG[C/T]GCTGGGAGAAAAGCATGCCAGATTC  |
|                                            | rs161473126 | 22:14967919 | ATTGAAAAACCATCAGCACGGCCCT[C/T]CTCAGAGCCAGTTTTATGAAACGTG  |
|                                            | rs161473140 | 22:14968714 | GAGAGTCATGGAACGGCTGTCAACA[A/G]TGGTGGTTAGGCAAGATGGTTCCCA  |

SNP ID: dbSNP reference records; Chr pos.: chromosome position on Oar\_v3.1.

**Table S2.** *p*-value and significance for milk yield and composition, milk coagulation properties (MCP) and curd firmness over time traits (CF<sub>t</sub>) according to the effect the 12 polymorphic SNPs out of 45 investigated in Sarda sheep (n = 1,112).

| Gene           | SNP ID      | Milk yield and composition |       |         |        |         |       |         |          | MCP    |                 |                 |                 |                 | CF <sub>t</sub> |                 |                 |                   |                  |
|----------------|-------------|----------------------------|-------|---------|--------|---------|-------|---------|----------|--------|-----------------|-----------------|-----------------|-----------------|-----------------|-----------------|-----------------|-------------------|------------------|
|                |             | dMY                        | Fat   | Protein | Casein | Lactose | pH    | SCS     | LBC      | RCT    | k <sub>20</sub> | a <sub>30</sub> | a <sub>45</sub> | a <sub>60</sub> | CF <sub>P</sub> | k <sub>CF</sub> | k <sub>SR</sub> | CF <sub>max</sub> | t <sub>max</sub> |
| <i>PRKAA2</i>  | rs119102735 | 0.773                      | 0.202 | 0.706   | 0.611  | 0.045*  | 0.714 | 0.735   | 0.808    | 0.971  | 0.866           | 0.255           | 0.194           | 0.588           | 0.477           | 0.842           | 0.406           | 0.180             | 0.928            |
| <i>PRKAA2</i>  | rs159701441 | 0.934                      | 0.455 | 0.729   | 0.713  | 0.420   | 0.614 | 0.775   | 0.450    | 0.747  | 0.684           | 0.960           | 0.684           | 0.517           | 0.923           | 0.406           | 0.470           | 0.319             | 0.557            |
| <i>PRKAG3</i>  | rs159573167 | 0.001***                   | 0.194 | 0.015*  | 0.023* | 0.065   | 0.898 | 0.004** | 0.001*** | 0.019* | 0.676           | 0.608           | 0.998           | 0.665           | 0.563           | 0.159           | 0.248           | 0.763             | 0.857            |
| <i>B4GALT1</i> | rs160175809 | 0.936                      | 0.334 | 0.339   | 0.470  | 0.753   | 0.673 | 0.417   | 0.631    | 0.769  | 0.528           | 0.798           | 0.723           | 0.332           | 0.424           | 0.765           | 0.418           | 0.408             | 0.999            |
| <i>TLR4</i>    | rs160202315 | 0.102                      | 0.216 | 0.016*  | 0.022* | 0.240   | 0.387 | 0.023*  | 0.001*** | 0.328  | 0.865           | 0.940           | 0.672           | 0.642           | 0.837           | 0.061           | 0.122           | 0.131             | 0.962            |
| <i>TYRP1</i>   | rs416417209 | 0.617                      | 0.432 | 0.383   | 0.557  | 0.980   | 0.666 | 0.800   | 0.161    | 0.346  | 0.316           | 0.674           | 0.807           | 0.473           | 0.760           | 0.424           | 0.671           | 0.825             | 0.492            |
| <i>IGF1</i>    | rs159876390 | 0.457                      | 0.379 | 0.223   | 0.182  | 0.800   | 0.551 | 0.090   | 0.060    | 0.834  | 0.830           | 0.401           | 0.275           | 0.326           | 0.106           | 0.436           | 0.504           | 0.916             | 0.824            |
| <i>GHRHR</i>   | rs409504706 | 0.814                      | 0.576 | 0.692   | 0.655  | 0.817   | 0.286 | 0.128   | 0.442    | 0.415  | 0.205           | 0.713           | 0.246           | 0.202           | 0.837           | 0.088           | 0.030*          | 0.693             | 0.618            |
| <i>CD14</i>    | rs160087383 | 0.001***                   | 0.848 | 0.523   | 0.530  | 0.603   | 0.862 | 0.235   | 0.215    | 0.039* | 0.279           | 0.019*          | 0.112           | 0.275           | 0.531           | 0.775           | 0.879           | 0.130             | 0.895            |
| <i>GHR</i>     | rs408890407 | 0.544                      | 0.835 | 0.849   | 0.902  | 0.065   | 0.389 | 0.372   | 0.729    | 0.498  | 0.241           | 0.773           | 0.999           | 0.962           | 0.161           | 0.289           | 0.337           | 0.944             | 0.436            |
| <i>GHR</i>     | rs55631463  | 0.140                      | 0.653 | 0.930   | 0.988  | 0.780   | 0.296 | 0.596   | 0.853    | 0.443  | 0.308           | 0.214           | 0.130           | 0.349           | 0.387           | 0.109           | 0.001***        | 0.767             | 0.764            |
| <i>GHR</i>     | rs428862267 | 0.094                      | 0.600 | 0.822   | 0.808  | 0.373   | 0.666 | 0.658   | 0.214    | 0.131  | 0.763           | 0.039*          | 0.065           | 0.207           | 0.705           | 0.330           | 0.159           | 0.395             | 0.454            |

dMY: daily milk yield; SCS: somatic cell score =  $\log_2(\text{SCC} \times 10^{-5}) + 3$ ; LBC: logarithmic bacterial count =  $\log_{10}$  total bacterial count (total bacterial count/1,000); RCT: rennet coagulation time; k<sub>20</sub>: curd firming time; a<sub>30</sub>, a<sub>45</sub>, and a<sub>60</sub>: curd firmness 30, 45 and 60 minutes after rennet addition; CF<sub>P</sub>: the maximum potential curd firmness after an infinite time; k<sub>CF</sub>: curd-firming rate constant; k<sub>SR</sub>: syneresis rate constant; CF<sub>max</sub>: maximum curd firmness; and t<sub>max</sub>: time to attain CF<sub>max</sub>.

\*\*\*  $p < 0.001$ ; \*\*  $p < 0.01$ ; \*  $p < 0.05$ ; no asterisk: non significant.

**Table S3.** *p*-value and significance for milk yield and composition, milk coagulation properties (MCP) and curd firmness over time traits (CF<sub>t</sub>) according to the effect of the block evidenced among the 45 SNPs investigated in Sarda sheep (n = 1,112).

| Evidenced among the 45 SNPs investigated in Sarda sheep (n = 1,112). |                            |       |         |        |         |       |       |       |       |                 |                 |                 |                 |                 |                 |                 |                   |                  |
|----------------------------------------------------------------------|----------------------------|-------|---------|--------|---------|-------|-------|-------|-------|-----------------|-----------------|-----------------|-----------------|-----------------|-----------------|-----------------|-------------------|------------------|
| Block                                                                | Milk yield and composition |       |         |        |         |       |       |       | MCP   |                 |                 |                 |                 | CF <sub>t</sub> |                 |                 |                   |                  |
| ID                                                                   | dMY                        | Fat   | Protein | Casein | Lactose | pH    | SCS   | LBC   | RCT   | k <sub>20</sub> | a <sub>30</sub> | a <sub>45</sub> | a <sub>60</sub> | CF <sub>P</sub> | k <sub>CF</sub> | k <sub>SR</sub> | CF <sub>max</sub> | t <sub>max</sub> |
| Block 1                                                              | 0.870                      | 0.429 | 0.989   | 0.803  | 0.320   | 0.689 | 0.954 | 0.326 | 0.695 | 0.894           | 0.579           | 0.536           | 0.838           | 0.325           | 0.507           | 0.572           | 0.967             | 0.889            |

Block 1: chromosome 16, GHR gene SNPs rs408890407 and rs55631463. dMY: daily milk yield; SCS: somatic cell score =  $\log_2 (\text{SCC} \times 10^{-5}) + 3$ ; LBC: logarithmic bacterial count =  $\log_{10}$  total bacterial count (total bacterial count/1,000); RCT: rennet coagulation time; k<sub>20</sub>: curd firming time; a<sub>30</sub>, a<sub>45</sub>, and a<sub>60</sub>: curd firmness 30, 45 and 60 minutes after rennet addition; CF<sub>P</sub>: the maximum potential curd firmness after an infinite time; k<sub>CF</sub>: curd-firming rate constant; k<sub>SR</sub>: syneresis rate constant; CF<sub>max</sub>: maximum curd firmness; and t<sub>max</sub>: time to attain CF<sub>max</sub>.

No asterisk: non significant.
